# Supplementary material for: Quantitative determination of methylene blue in environmental samples by solid-phase extraction and ultra-performance liquid chromatography-tandem mass spectrometry: a green approach
Source: Royal Society of Chemistry journal article supplement (doi:10.1039/c4ra03504f), 2014-01-01
Supplement: c4ra03504f1.pdf [file c4ra03504f1.pdf]

## **Supporting Information**

### **Quantitative Determination of Methylene Blue in Environmental Samples by Solid Phase Extraction and Ultra Performance Liquid Chromatography- Tandem Mass Spectrometry: A Green Approach**

Mohammad Rizwan Khan<sup>a</sup>, Moonis Ali Khan<sup>a,\*</sup>, Zeid Abdullah Alothman<sup>a</sup>,

Ibrahim Hotan Alsohaimi<sup>a</sup>, Mu Naushad<sup>a</sup>, Nora H. Al-Shaalan<sup>b</sup>

<sup>a</sup>Advanced Materials Research Chair, Department of Chemistry, College of Science,  
King Saud University, P.O. Box 2455, Riyadh 11451, Kingdom of Saudi Arabia

<sup>b</sup>Department of Chemistry, College of Science, Princess Nora Bint Abdul Rahman University,  
Riyadh, Saudi Arabia

---

\*Corresponding author

Tel: +966 14674198; Fax: +966 14675992; E-mail: [moonisalikhan@gmail.com](mailto:moonisalikhan@gmail.com);

[mokhan@ksu.edu.sa](mailto:mokhan@ksu.edu.sa) (M.A. Khan)

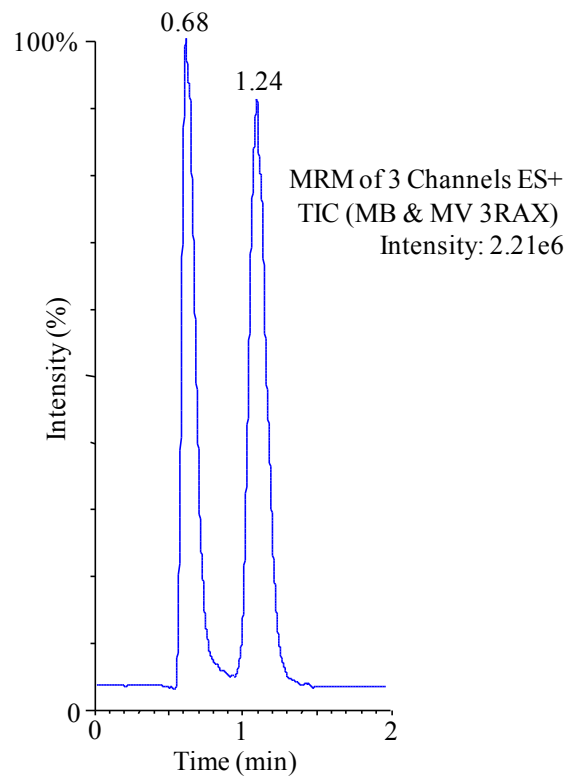

**Figure S1.** UPLC-MS/MS chromatograms of standard mixture (1  $\mu\text{g/mL}$ ) of MB (RT, 0.68) & MV 3RAX (RT, 1.24).
